# Supplementary material for: Coccolithophore fluxes in the open tropical North Atlantic: influence of thermocline depth, Amazon water, and Saharan dust
Source: Copernicus journal article supplement (doi:10.5194/bg-14-4577-2017), 2017-10-17
Supplement: Supplementary file 1 [file bg-14-4577-2017-supplement.pdf]

Supplement of Biogeosciences, 14, 4577–4599, 2017  
<https://doi.org/10.5194/bg-14-4577-2017-supplement>  
© Author(s) 2017. This work is distributed under  
the Creative Commons Attribution 3.0 License.

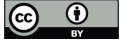

*Supplement of*

## **Coccolithophore fluxes in the open tropical North Atlantic: influence of thermocline depth, Amazon water, and Saharan dust**

**Catarina V. Guerreiro et al.**

*Correspondence to:* Catarina V. Guerreiro ([catarina.guerreiro@uni-bremen.de](mailto:catarina.guerreiro@uni-bremen.de))

The copyright of individual parts of the supplement might differ from the CC BY 3.0 License.

**List of oceanographic and meteorological parameters obtained from satellite imagery, and respective sensors, downloaded products and resolution of the downloaded data.**

| Parameter                           | Acronym       | Units                                    | Sensor     | Product    | Resolution | Source                                                                                                                                                                                                                                                                                                          | Reference                                                                                                    |
|-------------------------------------|---------------|------------------------------------------|------------|------------|------------|-----------------------------------------------------------------------------------------------------------------------------------------------------------------------------------------------------------------------------------------------------------------------------------------------------------------|--------------------------------------------------------------------------------------------------------------|
| Chlorophyll                         | Chl- <i>a</i> | mg m <sup>-3</sup>                       | MODIS-Aqua | L2-daily   | 1 km       | <a href="https://oceancolor.gsfc.nasa.gov/cgi/browse.pl?sen=am">https://oceancolor.gsfc.nasa.gov/cgi/browse.pl?sen=am</a> <a href="https://oceancolor.gsfc.nasa.gov/cgi/browse.pl?sen=am">https://oceancolor.gsfc.nasa.gov/cgi/browse.pl?sen=am</a>                                                             | OBPG 2014; Hu et al. 2012                                                                                    |
|                                     |               |                                          |            | L3-monthly | 4km        | <a href="https://oceancolor.gsfc.nasa.gov/cgi/13">https://oceancolor.gsfc.nasa.gov/cgi/13</a>                                                                                                                                                                                                                   |                                                                                                              |
| Sea Surface Temperature             | SST           | °C                                       | MODIS-Aqua | L2-daily   | 1 km       | <a href="https://oceancolor.gsfc.nasa.gov/cgi/browse.pl?sen=am">https://oceancolor.gsfc.nasa.gov/cgi/browse.pl?sen=am</a>                                                                                                                                                                                       | OBPG 2014; Frouin et al. 2003 & 2012                                                                         |
| Photosynthetic Available Radiation  | PAR           | Einstein m <sup>-2</sup> d <sup>-1</sup> | MODIS-Aqua | L2-daily   | 1 km       | <a href="https://oceancolor.gsfc.nasa.gov/cgi/browse.pl?sen=am">https://oceancolor.gsfc.nasa.gov/cgi/browse.pl?sen=am</a>                                                                                                                                                                                       | OBPG 2014; Brown and Minnett (1999)                                                                          |
| Aerosol Optical Depth               | AOD           | none                                     | MODIS-Aqua | L2-daily   | 10 km      | <a href="https://ladsweb.modaps.eosdis.nasa.gov/search/order/1/MYD04_L2--6">https://ladsweb.modaps.eosdis.nasa.gov/search/order/1/MYD04_L2--6</a>                                                                                                                                                               | Levy, R., Hsu, C., et al., 2015.                                                                             |
| Precipitation                       | Prec          | mm day <sup>-1</sup>                     | multiple   | L3-daily   | 0.25°      | <a href="https://disc.gsfc.nasa.gov/datasets/TRMM_3B42RT_Daily_7/summary">https://disc.gsfc.nasa.gov/datasets/TRMM_3B42RT_Daily_7/summary</a>                                                                                                                                                                   | Goddard Earth Sciences Data and Information Services Center (2016); Huffman et al. 2007; Xie and Arkin, 1997 |
| Sea Surface Salinity and Wind Speed | SSS WSp       | none m s <sup>-1</sup>                   | Aquarius   | L3-daily   | 1°         | <a href="https://podaac.jpl.nasa.gov/dataset/AQUARIUS_L3_WIND_SPEED_SMI_DAILY_V4">https://podaac.jpl.nasa.gov/dataset/AQUARIUS_L3_WIND_SPEED_SMI_DAILY_V4</a> & <a href="https://podaac.jpl.nasa.gov/dataset/AQUARIUS_L3_SSS_SMI_DAILY_V4">https://podaac.jpl.nasa.gov/dataset/AQUARIUS_L3_SSS_SMI_DAILY_V4</a> | NASA Aquarius project, 2015a & 2015b; Lee et al. 2012                                                        |

## References

- Brown, O. B. and Minnett, P. J.: MODIS Infrared Sea Surface Temperature Algorithm – Algorithm Theoretical Basis Document, University of Miami, Miami, FL, 91p., 1999.
- Frouin, R., Franz, B. A., Werdell, P. J., 2003. The SeaWiFS PAR product., In: S.B. Hooker and E.R. Firestone, Algorithm Updates for the Fourth SeaWiFS Data Reprocessing, NASA Tech. Memo. 2003–206892, Volume 22, NASA Goddard Space Flight Center, Greenbelt, Maryland, 46-50. The SeaWiFS PAR product.
- Goddard Earth Sciences Data and Information Services Center (2016), TRMM (TMPA-RT) Near Real-Time Precipitation L3 1 day 0.25 degree x 0.25 degree V7, Greenbelt, MD, Goddard Earth Sciences Data and Information Services Center (GES DISC), Accessed [11/11/2016]  
[http://disc.gsfc.nasa.gov/datacollection/TRMM\\_3B42RT\\_Daily\\_7.html](http://disc.gsfc.nasa.gov/datacollection/TRMM_3B42RT_Daily_7.html)
- Hu, C., Lee, Z., and Franz, B. A.: Chlorophyll a algorithms for oligotrophic oceans: a novel approach based on three-band reflectance difference, *J. Geophys. Res.*, 117, C01011TS34, 2012, doi:10.1029/2011JC007395
- Huffman, G.J., Adler, R.F., Bolvin, D.T., Gu, G., Nelkin, E.J., Bowman, K.P., Hong, Y., Stocker, E.F., Wolff, D.B., 2007. The TRMM Multi-satellite Precipitation Analysis: Quasi- Global, Multi-Year, Combined-Sensor Precipitation Estimates at Fine Scale. *J. Hydrometeor.* 8 (1), 38-55.
- Lee, T., Lagerloef, G., Gierach, M.M., Kao, H.-Y., Yueh, S., Dohan, K., 2012. Aquarius reveals salinity structure of tropical instability waves, *Geophys. Res. Lett.*, 39, L12610.
- Levy, R., Hsu, C., et al., 2015. MODIS Atmosphere L2 Aerosol Product. NASA MODIS Adaptive Processing System, Goddard Space Flight Center, USA ([http://dx.doi.org/10.5067/MODIS/MYD04\\_L2.006](http://dx.doi.org/10.5067/MODIS/MYD04_L2.006)).
- NASA Aquarius project. 2015a. Aquarius Official Release Level 3 Sea Surface Salinity Standard Mapped Image Daily Data V4.0. Ver. 4.0. PO.DAAC, CA, USA.
- NASA Aquarius project. 2015b. Aquarius Official Release Level 3 Wind Speed Standard Mapped Image Daily Data V4.0. Ver. 4.0. PO.DAAC, CA, USA.
- Xie, P., Arkin, P.A., 1997. Global precipitation: A 17-year monthly analysis based on gauge observations, satellite estimates, and numerical model outputs. *Bull. Am. Meteor. Soc.*, 78, 2539 - 2558.

## **Taxonomy of coccolithophores**

For taxonomic references, see Jordan et al. (2004)

**Kingdom CHROMISTA** Cavalier-Smith, 1986

**Division HAPTOPHYTA** Hibberd, 1972

**Class PRYMNESIOPHYCEAE** Hibbert, 1976 emend. Cavalier-Smith et al., 1996

**Order COCCOLITHALES** Schwartz, 1932 emend. Edvardsen et al., 2000

Family CALCIDISCACEAE Young and Bown, 1997

Genus *Calcidiscus* Kamptner, 1950

*Calcidiscus leptoporus* (Murray and Blackman, 1898) Loeblich and Tappan, 1978

Genus *Hayaster* Bukry 1973

*Hayaster perplexus* (Bramlette and Riedel 1954) Bukry 1973

Genus *Oolithotus* Reinhardt in Cohen and Reinhardt 1968

*Oolithotus antillarum* (Cohen 1964) Reinhardt in Cohen and Reinhardt 1968

*Oolithotus fragilis* (Lohmann 1912) Martini and Müller 1972

Genus *Umbilicosphaera* Lohmann, 1902

*Umbilicosphaera anulus* (Lecal 1967) Young and Geisen in Young et al. 2003

*Umbilicosphaera foliosa* (Kamptner 1963 ex Kleijne 1993) Geisen in Sáez et al. 2003b

*Umbilicosphaera hulburtiana* Gaarder 1970

*Umbilicosphaera sibogae* (Weber-van Bosse 1901) Gaarder 1970

**Order ISOCHRYSIDALES** Pascher, 1910 emend. Edvardsen and Eikrem in Edvardsen et al., 2000

Family NOELAERHABDACEAE Jerkovic, 1970 emend. Young and Bown, 1997

Genus *Emiliana* Hay and Mohler in Hay et al., 1967

*Emiliana huxleyi* (Lohmann, 1902) Hay and Mohler, 1967

Genus *Gephyrocapsa* Kamptner, 1943

*Gephyrocapsa ericsonii* McIntyre and Bé, 1967

*Gephyrocapsa muelleriae* Bréhéret, 1978

*Gephyrocapsa oceanica* Kamptner, 1943

Genus *Reticulofenestra* Hay et al. 1966

*Reticulofenestra sessilis* (Lohmann 1912) Jordan and Young 1990

**Order SYRACOSPHAERALES** Hay, 1977 emend. Young et al., 2003

Family CALCIOSOLENIACEAE Kamptner 1937

Genus *Calciosolenia* Gran 1912; emend. Young et al. 2003 (35)

*Calciosolenia brasiliensis* (Lohmann 1919) Young in Young et al. 2003

*Calciosolenia murrayi* Gran 1912

Family RHABDOSPHAERACEAE Haeckel 1894

Genus *Acanthoica* Lohmann 1903; emend. Schiller 1913, Kleijne 1992

*Acanthoica quattropsina* Lohmann 1903

Genus *Algirosphaera* Schlauder 1945; emend. Norris 1984

*Algirosphaera robusta* (Lohmann 1902) Norris 1984

Genus *Discosphaera* Haeckel 1894

*Discosphaera tubifera* (Murray and Blackman 1898) Ostfeld 1900

Genus *Palusphaera* Lecal 1966a; emend. Norris 1984

*Palusphaera vandellii* Lecal 1966a; emend. Norris 1984

Genus *Rhabdosphaera* Haeckel 1894

*Rhabdosphaera clavigera* Murray and Blackman 1898

*Rhabdosphaera clavigera* Murray and Blackman 1898

*Rhabdosphaera xiphos* (Deflandre and Fert 1954) Norris 1984

Family SYRACOSPHAERACEAE (Lohmann, 1902) Lemmermann, 1903

Genus *Ophiaster* Gran 1912; emend. Manton and Oates 1983b

Genus *Syracosphaera* Lohmann, 1902

*Syracosphaera anthos* (Lohmann 1912) Janin 1987

*Syracosphaera lamina* Lecal-Schlauder 1951

*Syracosphaera molischii* Schiller 1925  
*Syracosphaera pulchra* Lohmann, 1902

### **GENERA INCERTAE SEDIS**

Families with possible affinities to the Syracosphaerales

Family ALISPHAERACEAE Young, Kleijne and Cros in Young et al. 2003

Genus *Alisphaera* Heimdal 1973; emend. Jordan and Chamberlain 1993a; Kleijne et al. 2002

*Alisphaera unicornis* Okada and McIntyre 1977

Family UMBELLOSPHAERACEAE Young and Kleijne in Young et al. 2003

Genus *Umbellosphaera* Paasche in Markali and Paasche 1955

*Umbellosphaera irregularis* Paasche in Markali and Paasche 1955

*Umbellosphaera tenuis* (Kamptner 1937) Paasche in Markali and Paasche 1955

Genera with possible affinities with the Syracosphaerales

Genus *Coronosphaera* Gaarder in Gaarder and Heimdal 1977

*Coronosphaera mediterranea* (Lohmann 1902) Gaarder in Gaarder and Heimdal 1977

**Order ZYGODISCALES** Young and Bown, 1997

Family HELICOSPHAERACEAE Black, 1971 emend. Jafar and Martini, 1975

Genus *Helicosphaera* Kamptner, 1954

*Helicosphaera carteri* (Wallich 1877) Kamptner 1954

*Helicosphaera hyalina* Gaarder 1970

*Helicosphaera wallichii* (Lohmann 1902) Okada and McIntyre 1977

Family PONTOSPHAERACEAE Lemmermann 1908

Genus *Pontosphaera* Lohmann 1902

*Pontosphaera multipora* (Kamptner 1948) Roth 1970

*Pontosphaera syracusana* Lohmann 1902

Genus *Scyphosphaera* Lohmann 1902

*Scyphosphaera apsteinii* Lohmann 1902

### **HOLOCOCOLITH-BEARING TAXA**

Family CALYPTROSPHAERACEAE Boudreaux and Hay 1969

Genus *Syracolithus* (Kamptner 1941) Deflandre 1952

*Syracolithus dalmaticus* (Kamptner 1927) Loeblich Jr. and Tappan 1966

*Syracolithus schilleri* (Kamptner 1927) Kamptner 1956

### **NANNOLITH-BEARING FAMILIES**

Family CERATOLITHACEAE Norris 1965

Genus *Ceratolithus* Kamptner 1950

*Ceratolithus cristatus* Kamptner 1950

### **NANNOLITH-BEARING GENERA INCERTAE SEDIS**

Genus *Florisphaera* Okada and Honjo 1973

*Florisphaera profunda* var. *elongata* Okada and McIntyre 1980

*Florisphaera profunda* Okada and Honjo 1973 var. *profunda*

Genus *Gladiolithus* Jordan and Chamberlain 1993b

*Gladiolithus flabellatus* (Halldal and Markali 1955) Jordan and Chamberlain 1993b
